# Supplementary material
Source: PubMed Central journal article supplement (PMC3751542)
Supplement: cn300180a_si_001.pdf [file cn300180a_si_001.pdf]

Supplementary Information for:

**KEY BINDING INTERACTIONS FOR MEMANTINE IN THE NMDA RECEPTOR**

**Walrati Limapichat, Wesley Yu, Emma Branigan, Henry Lester, and Dennis Dougherty**

LEGENDS TO SUPPLEMENTAL DATA

Supplemental Figure 1: Memantine fold shifts ( $IC_{50}(\text{mutant})/IC_{50}(\text{wild type})$ ) of mutant NMDA receptors containing a conventional or an unnatural mutation in the transmembrane region. Abbreviation used are F4W, 2,3,4,5-fluoro-Trp; Cha, cyclohexylalanine; hGln, homoglutamine; F3-Phe, 3,4,5-fluoro-Phe. \*, Conventional mutations performed through the nonsense-suppression method. Unnatural amino acid mutagenesis was performed using established protocols.<sup>1</sup>

Supplemental Figure 2. Representative response curves. A. Wild type receptor exposed to 5.6  $\mu\text{M}$  memantine (solid line). B. N1-645N exposed to 100  $\mu\text{M}$  memantine (solid line).

Supplemental Table 1: Glutamate EC<sub>50</sub> ± s.e.m. and Hill constant of wild-type and mutant

NMDA receptors. Hill equation was used to fit data:  $I/I_{max} = 1/(1 + (EC_{50}/[A])^{n_H})$ , where  $I_{max}$  is the current response to agonist activation,  $I$  is the agonist-activated current measured in the presence of antagonist at the concentration ( $A$ ).

| <b>NMDA Receptor</b>  | <b>Glutamate EC<sub>50</sub></b> | <b>Hill Constant</b> | <b><i>n</i><sup>1</sup></b> | <b>EC<sub>50</sub>(mutant)/EC<sub>50</sub>(wild type)</b> |
|-----------------------|----------------------------------|----------------------|-----------------------------|-----------------------------------------------------------|
|                       | μM                               |                      |                             |                                                           |
| Wild type             | 1.94 ± 0.04                      | 1.7                  | 8                           | 1.00                                                      |
| <b>GluN1 Mutants</b>  |                                  |                      |                             |                                                           |
| N616Q                 | 0.47 ± 0.01                      | 1.6                  | 11                          | 0.24                                                      |
| N616D                 | 1.3 ± 0.02                       | 1.8                  | 14                          | 0.65                                                      |
| V644T                 | 2.0 ± 0.03                       | 1.6                  | 11                          | 1.01                                                      |
| V644L                 | 1.3 ± 0.02                       | 1.5                  | 10                          | 0.67                                                      |
| V644N                 | 1.7 ± 0.03                       | 1.6                  | 12                          | 0.89                                                      |
| A645V                 | 0.93 ± 0.03                      | 1.6                  | 8                           | 0.48                                                      |
| A645L                 | 0.60 ± 0.02                      | 1.3                  | 9                           | 0.31                                                      |
| A645N                 | 0.33 ± 0.01                      | 2.1                  | 7                           | 0.17                                                      |
| V656N                 | 0.20 ± 0.01                      | 2.3                  | 7                           | 0.10                                                      |
| <b>GluN2B Mutants</b> |                                  |                      |                             |                                                           |
| N615D                 | 2.9 ± 0.06                       | 1.7                  | 5                           | 1.01                                                      |
| N616D                 | 2.8 ± 0.04                       | 1.5                  | 6                           | 1.45                                                      |
| A639N                 | 0.63 ± 0.02                      | 1.5                  | 9                           | 0.32                                                      |
| V640N                 | 2.8 ± 0.10                       | 1.6                  | 9                           | 1.42                                                      |
| L643N                 | 1.2 ± 0.03                       | 1.5                  | 9                           | 0.64                                                      |
| A644V                 | 0.61 ± 0.05                      | 1.2                  | 5                           | 0.31                                                      |
| A644L                 | 0.76 ± 0.05                      | 1.5                  | 11                          | 0.39                                                      |
| A644N                 | 0.73 ± 0.01                      | 1.7                  | 9                           | 0.37                                                      |

<sup>1</sup> *n*, number of oocytes

Supplemental Table 2: TMAM IC<sub>50</sub> ± s.e.m. for wild type and mutant NMDA receptors.

| NMDA Receptor   | TMAM IC <sub>50</sub> | <i>n</i> <sup>1</sup> | IC <sub>50</sub> (mutant)/IC <sub>50</sub> (wild type) |
|-----------------|-----------------------|-----------------------|--------------------------------------------------------|
|                 | μM                    |                       |                                                        |
| Wild type       | 3.4 ± 0.4             | 10                    | 1.0                                                    |
| GluN1(N616Q)/2B | 2.0 ± 0.08            | 9                     | 0.6                                                    |
| GluN1(V644T)/2B | 3.1 ± 0.4             | 10                    | 0.9                                                    |
| GluN1(A645N)/2B | 180 ± 11              | 12                    | 53                                                     |
| GluN1/2B(N615D) | 5.4 ± 1.1             | 13                    | 1.6                                                    |
| GluN1/2B(N616D) | 2.9 ± 0.4             | 8                     | 0.9                                                    |
| GluN1/2B(V640N) | 0.72 ± 0.1            | 8                     | 0.2                                                    |
| GluN1/2B(A644N) | 100 ± 7.4             | 11                    | 30                                                     |

<sup>1</sup> *n*, number of oocytes

Supplemental Figure 1

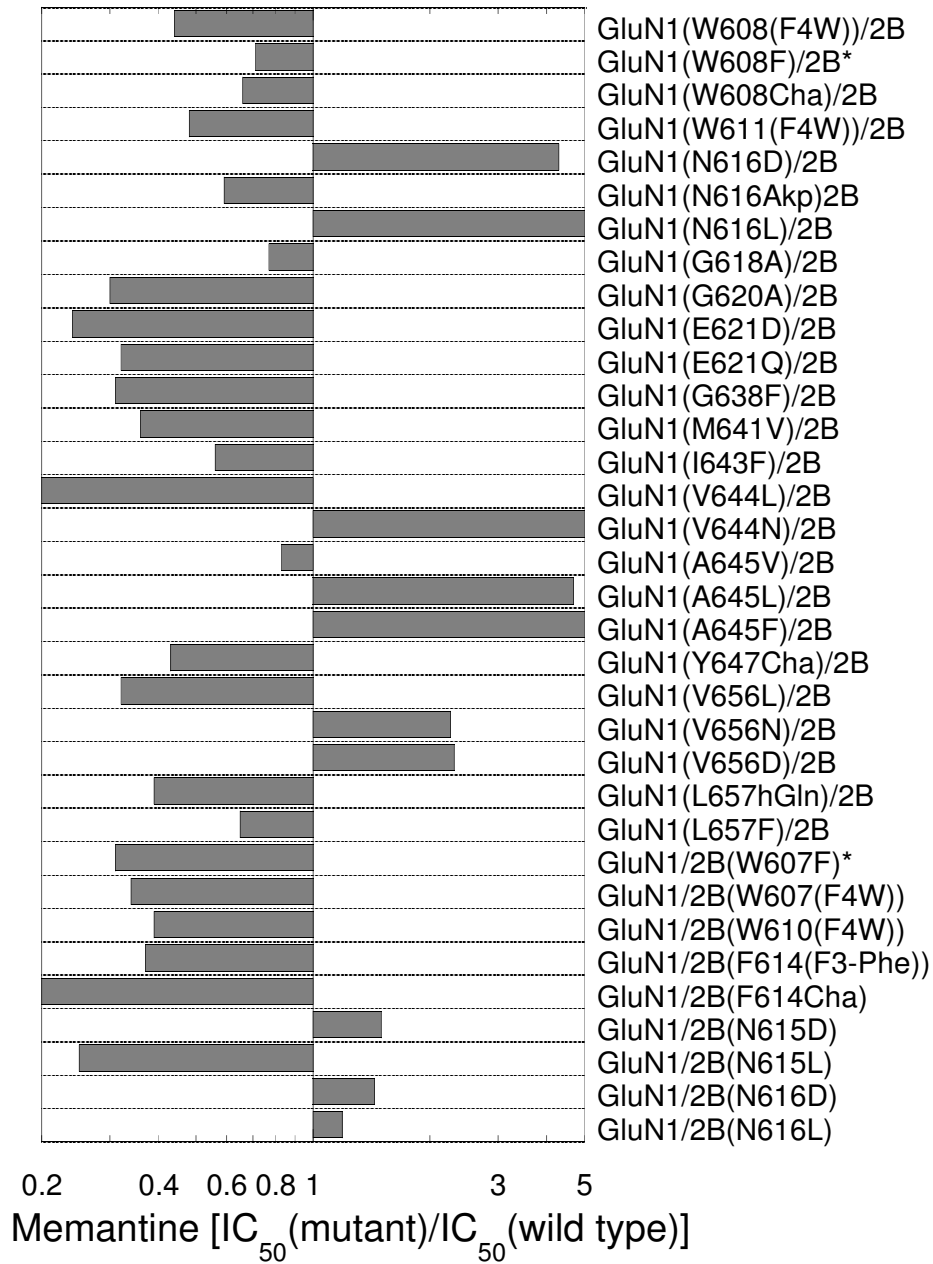

Supplemental Figure 2.

A.

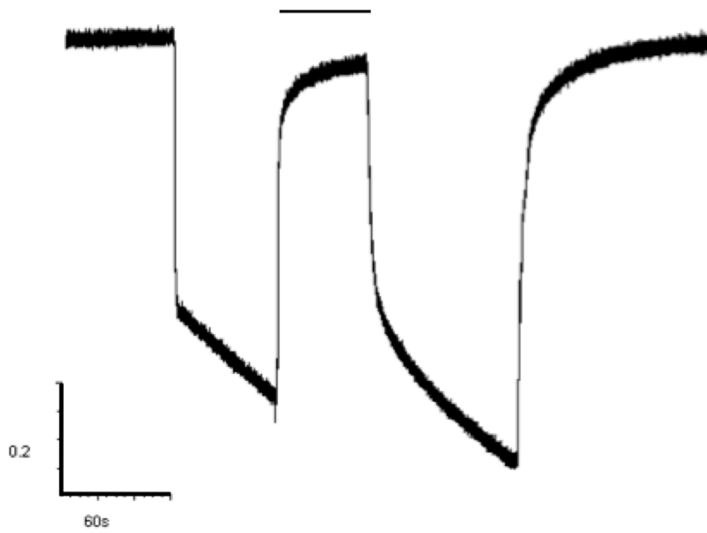

B.

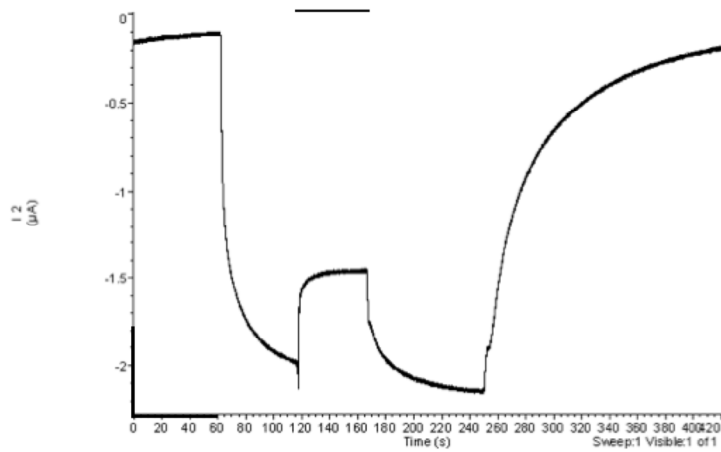

**Reference:**

(1) Nowak, M. W.; Gallivan, J. P.; Silverman, S. K.; Labarca, C. G.; Dougherty, D. A.; Lester, H. A., (1998) *In vivo* incorporation of unnatural amino acids into ion channels in a *Xenopus* oocyte expression system. *Methods Enzymol* 293, 504-529.
